# Supplementary material for: Differential gene expression profile between progressive and de novo muscle invasive bladder cancer and its prognostic implication
Source: PubMed Central journal article supplement (PMC7969618; doi:10.1038/s41598-021-85137-1), 2021-03-17
Supplement: 41598_2021_85137_MOESM1_ESM.pdf [file 41598_2021_85137_MOESM1_ESM.pdf]

## SUPPLEMENTARY MATERIAL

### **Differential gene expression profile comparison between progressive and *de novo* muscle invasive bladder cancer: prognostic implications**

Raquel Carrasco<sup>1\*</sup>, Laura Izquierdo<sup>1\*</sup>, Antoine G. van der Heijden<sup>2</sup>, Juan José Lozano<sup>3</sup>, Marco Franco<sup>1</sup>, Mercedes Ingelmo-Torres<sup>1</sup>, Fiorella L. Roldan<sup>1</sup>, Montserrat Llorens<sup>1</sup>, María José Ribal<sup>1</sup>, Lourdes Mengual<sup>1</sup>, Antonio Alcaraz<sup>1</sup>

<sup>1</sup> *Laboratory and Department of Urology, Hospital Clínic, Institut d'Investigacions Biomèdiques August Pi i Sunyer (IDIBAPS), Universitat de Barcelona, Barcelona, Spain*

<sup>2</sup> *Department of Urology, Radboud University Medical Center, Nijmegen, The Netherlands*

<sup>3</sup> *CIBERehd, Plataforma de Bioinformàtica, Centro de Investigación Biomédica en red de Enfermedades Hepáticas y Digestivas, Barcelona, Spain*

\*These authors have contributed equally to this work

#### **Contact information corresponding author**

Lourdes Mengual, Ph.D.  
Laboratory of Urology. Hospital Clínic de Barcelona.  
Centre de Recerca Biomèdica CELLEX, office B22.  
C/Casanova, 143  
08036 Barcelona, Spain  
Tel: [\(+34\) 93 227 54 00 Ext. 4820](tel:+34932275400)  
e-mail: [lmengual@clinic.cat](mailto:lmengual@clinic.cat)

**Keywords (MeSH):** bladder cancer; gene expression profiling; prognosis; *de novo*; progressive

Supplementary Figure S1. Gene-gene interaction network for the genes that define the different gene expression profile of progressive and *de novo* MIBC groups (A) and functional gene enrichment analysis for the genes that define the different gene expression profile of both MIBC groups (B).

A)

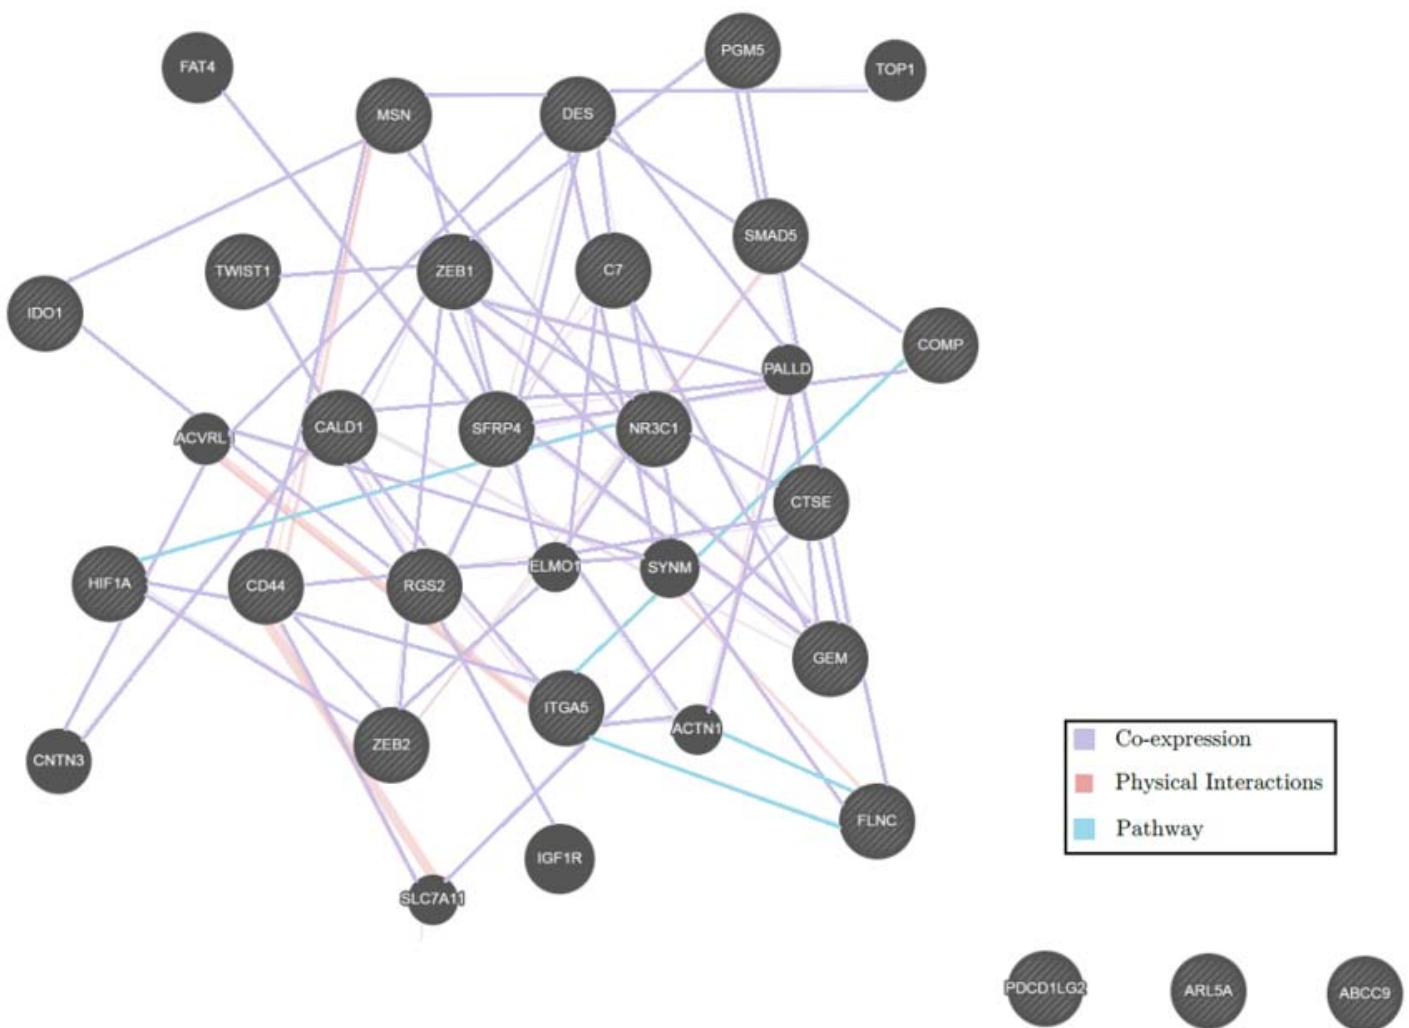

The 23 DEGs between progressive and *de novo* MIBC are shown in striped circles.

B)

| ID         | NAME PATHWAY                                                                | SOURCE                                   | FDR    | GENES                                 |
|------------|-----------------------------------------------------------------------------|------------------------------------------|--------|---------------------------------------|
| 782000     | *Proteoglycans in cancer                                                    | BioSystems: KEGG                         | <0.001 | CD44, FLNC, HIF1A, TWIST1, ITGA5, MSN |
| 1383026    | *PTK6 Expression                                                            | BioSystems: REACTOME                     | <0.001 | HIF1A, NR3C1                          |
| 1270260    | Integrin cell surface interactions                                          | BioSystems: REACTOME                     | <0.001 | CD44, ITGA5, COMP                     |
| 83068      | *ECM-receptor interaction                                                   | BioSystems: KEGG                         | <0.001 | CD44, ITGA5, COMP                     |
| 1470923    | Interleukin-4 and 13 signaling                                              | BioSystems: REACTOME                     | <0.001 | HIF1A, ZEB1, TWIST1                   |
| 852705     | MicroRNAs in cancer                                                         | BioSystems: KEGG                         | <0.001 | CD44, ZEB2, ZEB1, ITGA5               |
| 1269872    | BMAL1: CLOCK, NPAS2 activates circadian gene expression                     | BioSystems: REACTOME                     | <0.001 | HIF1A, NR3C1                          |
| 169347     | Notch-mediated HES/HEY network                                              | BioSystems: Pathway Interaction Database | <0.001 | HIF1A, TWIST1                         |
| 83067      | *Focal adhesion                                                             | BioSystems: KEGG                         | <0.001 | FLNC, ITGA5, COMP                     |
| 1269868    | *Muscle contraction                                                         | BioSystems: REACTOME                     | <0.001 | CALD1, DES, ABCC9                     |
| 83104      | Shigellosis                                                                 | BioSystems: KEGG                         | <0.001 | CD44, ITGA5                           |
| 1270417    | Oxygen-dependent asparagine hydroxylation of Hypoxia-inducible Factor Alpha | BioSystems: REACTOME                     | <0.001 | HIF1A                                 |
| 1383025    | Signaling by PTK6                                                           | BioSystems: REACTOME                     | <0.001 | HIF1A, NR3C1                          |
| M167       | AP-1 transcription factor network                                           | MSigDB C2 BIOCARTEA (v7.1)               | <0.001 | HIF1A, NR3C1                          |
| 1269871    | Circadian Clock                                                             | BioSystems: REACTOME                     | <0.001 | HIF1A, NR3C1                          |
| 117293     | Arrhythmogenic right ventricular cardiomyopathy (ARVC)                      | BioSystems: KEGG                         | <0.001 | DES, ITGA5                            |
| 1269828    | ATP sensitive Potassium channels                                            | BioSystems: REACTOME                     | <0.001 | ABCC9                                 |
| 114229     | Hypertrophic cardiomyopathy (HCM)                                           | BioSystems: KEGG                         | <0.001 | DES, ITGA5                            |
| PW:0000330 | Bone morphogenetic proteins signaling                                       | Pathway Ontology                         | <0.001 | SMAD5                                 |
| M2642      | TGF-beta signaling pathway                                                  | MSigDB C2 BIOCARTEA (v7.1)               | <0.001 | SMAD5, COMP                           |
| M6856      | Hematopoietic cell lineage                                                  | MSigDB C2 BIOCARTEA (v7.1)               | <0.001 | CD44, ITGA5                           |

Abbreviations: FDR: False Discovery Rate

Selected pathways involved in tumor progression are indicated with a \*.

Supplementary Figure S2. Kaplan-Meier curve for tumor progression comparing patients having positive or negative lymph nodes (LN).

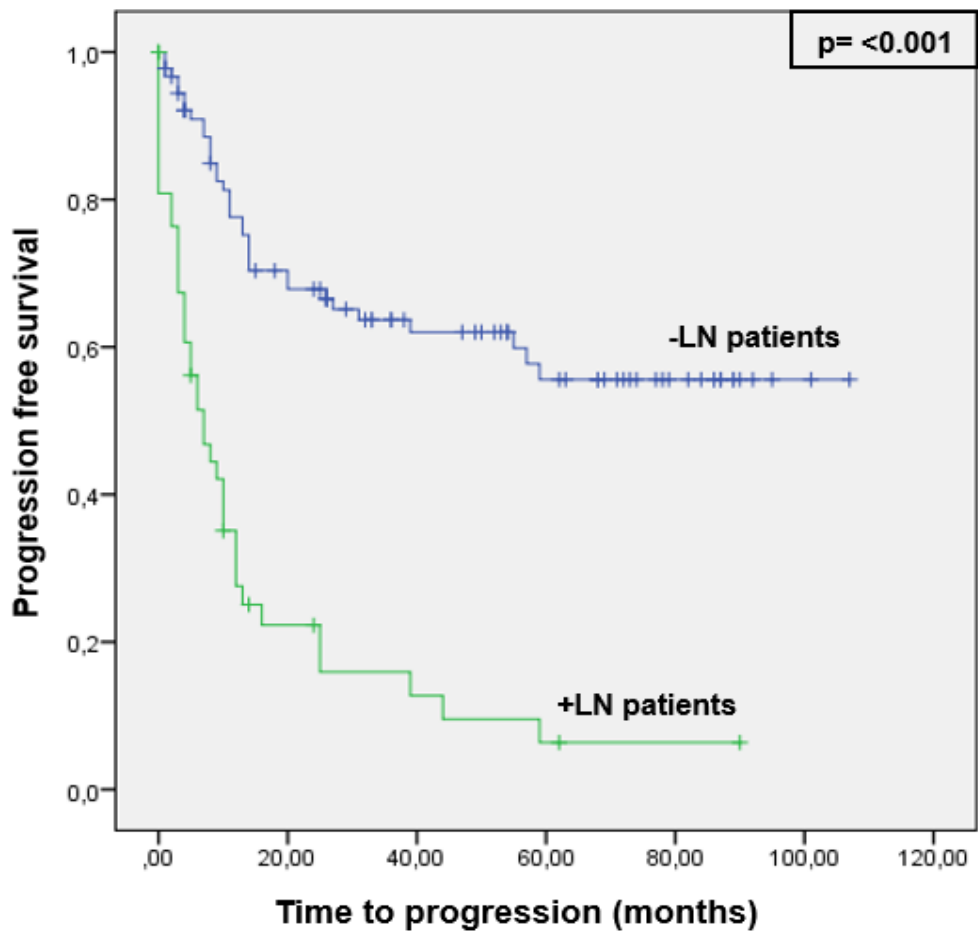

**Supplementary Table S1. Differently expressed transcripts between progressive and *de novo* MIBC patients from the discovery phase analyzed by Illumina microarray.**

| <b>Gene</b>      | <b>Fold change</b> | <b>p-Value</b> |
|------------------|--------------------|----------------|
| <i>SPRR2E</i>    | -19,10             | <0,001         |
| <i>CALML3</i>    | -13,92             | <0,001         |
| <i>CEP250</i>    | -8,95              | <0,001         |
| <i>IFI27</i>     | -7,24              | <0,001         |
| <i>SFN</i>       | -6,17              | <0,001         |
| <i>GJB3</i>      | -5,69              | <0,001         |
| <i>KLHDC7B</i>   | -5,60              | <0,001         |
| <i>USP42</i>     | -5,30              | <0,001         |
| <i>TRIM7</i>     | -4,87              | <0,001         |
| <i>CHMP4B</i>    | -4,75              | <0,001         |
| <i>CD8A</i>      | -3,48              | <0,001         |
| <i>EXD3</i>      | -3,25              | <0,001         |
| <i>FOXF2</i>     | 1,37               | 0,003          |
| <i>NARG1L</i>    | 1,50               | 0,002          |
| <i>PFN2</i>      | 1,53               | 0,002          |
| <i>MTUS1</i>     | 1,53               | 0,003          |
| <i>SMAD7</i>     | 1,55               | 0,003          |
| <i>ALLC</i>      | 1,56               | 0,003          |
| <i>ARL6</i>      | 1,56               | 0,002          |
| <i>THAP1</i>     | 1,56               | 0,001          |
| <i>UCMA</i>      | 1,58               | 0,003          |
| <i>CDC42EP1</i>  | 1,58               | 0,002          |
| <i>LSM12</i>     | 1,59               | 0,003          |
| <i>AP4S1</i>     | 1,59               | 0,003          |
| <i>LOC727811</i> | 1,60               | 0,002          |
| <i>LOC284441</i> | 1,61               | 0,001          |
| <i>CUGBP1</i>    | 1,62               | 0,002          |
| <i>FGF2</i>      | 1,63               | 0,003          |
| <i>RYK</i>       | 1,64               | 0,003          |
| <i>USP46</i>     | 1,65               | 0,002          |
| <i>ARAP3</i>     | 1,67               | <0,001         |
| <i>ZNF302</i>    | 1,68               | 0,002          |
| <i>CEP57</i>     | 1,69               | 0,002          |
| <i>PIGK</i>      | 1,70               | 0,001          |
| <i>DNAJC7</i>    | 1,71               | 0,003          |
| <i>NEDD9</i>     | 1,71               | 0,003          |
| <i>GTF3C6</i>    | 1,71               | 0,002          |
| <i>DYNLRB1</i>   | 1,71               | 0,002          |
| <i>FNTA</i>      | 1,72               | 0,001          |

|                     |      |         |
|---------------------|------|---------|
| <i>SSTR1</i>        | 1,72 | p<0,001 |
| <i>ISCA1L</i>       | 1,73 | 0,002   |
| <i>ALK</i>          | 1,75 | 0,003   |
| <i>ACCN3</i>        | 1,75 | 0,002   |
| <i>FOXP2</i>        | 1,76 | 0,002   |
| <i>AQP12B</i>       | 1,76 | 0,002   |
| <i>LOC441666</i>    | 1,76 | 0,002   |
| <i>NOP2</i>         | 1,76 | 0,001   |
| <i>LOC200030</i>    | 1,77 | 0,003   |
| <i>TNFSF18</i>      | 1,77 | 0,001   |
| <i>MRPL30</i>       | 1,77 | 0,001   |
| <i>C13orf33</i>     | 1,78 | 0,003   |
| <i>PRKD3</i>        | 1,80 | 0,003   |
| <i>MTERF</i>        | 1,80 | 0,002   |
| <i>C4BPB</i>        | 1,81 | p<0,001 |
| <i>TMEM59L</i>      | 1,82 | 0,001   |
| <i>MMP23B</i>       | 1,82 | 0,001   |
| <i>IMPDH1</i>       | 1,83 | 0,002   |
| <i>OTUB2</i>        | 1,84 | 0,002   |
| <i>UQCRC2</i>       | 1,84 | 0,001   |
| <i>STEAP1</i>       | 1,84 | 0,003   |
| <i>ZNF32</i>        | 1,85 | 0,003   |
| <i>LOC100216545</i> | 1,86 | 0,002   |
| <i>PPP1CB</i>       | 1,86 | 0,002   |
| <i>OR7G1</i>        | 1,86 | 0,003   |
| <i>ZDHHC9</i>       | 1,86 | 0,002   |
| <i>CPOX</i>         | 1,87 | 0,003   |
| <i>PHF14</i>        | 1,87 | 0,001   |
| <i>RPE</i>          | 1,87 | 0,001   |
| <i>TTYH2</i>        | 1,87 | 0,001   |
| <i>CBY1</i>         | 1,87 | 0,002   |
| <i>ZNF805</i>       | 1,88 | 0,001   |
| <i>PIR</i>          | 1,88 | 0,001   |
| <i>COPS2</i>        | 1,89 | 0,002   |
| <i>C11orf58</i>     | 1,89 | 0,003   |
| <i>STAR</i>         | 1,89 | 0,003   |
| <i>KRT37</i>        | 1,89 | 0,001   |
| <i>ABCA9</i>        | 1,89 | p<0,001 |
| <i>UBE2J2</i>       | 1,89 | 0,001   |
| <i>LOC653994</i>    | 1,89 | 0,002   |
| <i>KCNH2</i>        | 1,90 | p<0,001 |
| <i>FLJ23584</i>     | 1,90 | 0,001   |
| <i>CTRB1</i>        | 1,91 | 0,002   |
| <i>ATG4B</i>        | 1,91 | 0,002   |
| <i>PPP4R1L</i>      | 1,91 | 0,003   |
| <i>NIPSNAP3B</i>    | 1,91 | 0,001   |

|                    |      |         |
|--------------------|------|---------|
| <i>PPP2R5C</i>     | 1,92 | 0,002   |
| <i>GJC1</i>        | 1,93 | 0,001   |
| <i>SNORD58B</i>    | 1,93 | 0,002   |
| <i>ZNF557</i>      | 1,93 | 0,003   |
| <i>LOC440926</i>   | 1,93 | 0,003   |
| <i>PDCD10</i>      | 1,94 | 0,002   |
| <i>ALDH1B1</i>     | 1,94 | 0,003   |
| <i>ZNF518A</i>     | 1,94 | 0,002   |
| <i>NIPBL</i>       | 1,94 | 0,002   |
| <i>MOCS1</i>       | 1,94 | 0,002   |
| <i>NAP1L1</i>      | 1,95 | 0,002   |
| <i>COQ10B</i>      | 1,95 | 0,002   |
| <i>G3BP2</i>       | 1,95 | 0,002   |
| <i>GRK4</i>        | 1,97 | 0,002   |
| <i>CDK10</i>       | 1,98 | 0,003   |
| <i>SNORD113 3</i>  | 1,98 | 0,002   |
| <i>ACPL2</i>       | 1,98 | 0,001   |
| <i>GCOM1</i>       | 1,98 | 0,002   |
| <i>RIF1</i>        | 1,98 | 0,002   |
| <i>C15orf44</i>    | 1,99 | 0,001   |
| <i>SNX9</i>        | 1,99 | 0,002   |
| <i>MGC21881</i>    | 1,99 | 0,001   |
| <i>RAB20</i>       | 2,00 | 0,001   |
| <i>RERE</i>        | 2,01 | 0,002   |
| <i>C1CK0721Q.1</i> | 2,01 | p<0,001 |
| <i>CNIH</i>        | 2,01 | 0,002   |
| <i>C10orf32</i>    | 2,02 | 0,001   |
| <i>TBC1D19</i>     | 2,02 | p<0,001 |
| <i>SCAND2</i>      | 2,02 | 0,001   |
| <i>TADA2A</i>      | 2,02 | 0,001   |
| <i>C14orf11</i>    | 2,03 | 0,001   |
| <i>ECHDC1</i>      | 2,04 | 0,001   |
| <i>MAP3K10</i>     | 2,04 | 0,002   |
| <i>MYO18A</i>      | 2,04 | 0,003   |
| <i>SEC23A</i>      | 2,05 | 0,002   |
| <i>DIABLO</i>      | 2,06 | 0,002   |
| <i>PHLDA2</i>      | 2,06 | 0,003   |
| <i>SLC39A7</i>     | 2,06 | 0,002   |
| <i>PLEKHB2</i>     | 2,06 | 0,001   |
| <i>ZBTB8A</i>      | 2,06 | 0,002   |
| <i>PLAA</i>        | 2,06 | 0,002   |
| <i>SERPINA1</i>    | 2,07 | 0,003   |
| <i>NCRNA00153</i>  | 2,07 | 0,002   |
| <i>TFB2M</i>       | 2,07 | 0,001   |
| <i>ACN9</i>        | 2,09 | 0,001   |
| <i>TERF1</i>       | 2,09 | 0,001   |

|                   |      |         |
|-------------------|------|---------|
| <i>PUS3</i>       | 2,09 | 0,002   |
| <i>N4BP2</i>      | 2,09 | 0,001   |
| <i>TNPO2</i>      | 2,09 | 0,001   |
| <i>NCRNA00095</i> | 2,11 | 0,003   |
| <i>RPSA</i>       | 2,11 | 0,001   |
| <i>C7orf70</i>    | 2,11 | 0,001   |
| <i>FLJ20125</i>   | 2,12 | 0,001   |
| <i>ATAD1</i>      | 2,12 | 0,002   |
| <i>ZNF451</i>     | 2,12 | 0,001   |
| <i>ZNF321</i>     | 2,12 | 0,002   |
| <i>HADHA</i>      | 2,12 | 0,001   |
| <i>ZNF706</i>     | 2,13 | 0,001   |
| <i>SNORD113 2</i> | 2,13 | 0,001   |
| <i>SLC25A27</i>   | 2,13 | 0,002   |
| <i>UBE2MP1</i>    | 2,13 | 0,001   |
| <i>CALD1</i>      | 2,13 | 0,001   |
| <i>ASB7</i>       | 2,14 | p<0,001 |
| <i>JMJD8</i>      | 2,15 | 0,002   |
| <i>CROP</i>       | 2,15 | 0,003   |
| <i>ERGIC3</i>     | 2,15 | p<0,001 |
| <i>ZNF703</i>     | 2,15 | 0,002   |
| <i>ZFP42</i>      | 2,16 | 0,001   |
| <i>ARPP19</i>     | 2,16 | 0,001   |
| <i>SLC8A3</i>     | 2,16 | 0,001   |
| <i>SLC30A5</i>    | 2,16 | 0,001   |
| <i>ANK2</i>       | 2,16 | 0,002   |
| <i>NCOA3</i>      | 2,16 | 0,001   |
| <i>ZNF493</i>     | 2,17 | 0,003   |
| <i>ACSS2</i>      | 2,17 | 0,003   |
| <i>SYF2</i>       | 2,17 | 0,002   |
| <i>NUP62</i>      | 2,17 | 0,002   |
| <i>GADD45A</i>    | 2,18 | 0,003   |
| <i>DPP7</i>       | 2,18 | 0,002   |
| <i>PPP1R15B</i>   | 2,18 | 0,001   |
| <i>BOP1</i>       | 2,18 | 0,003   |
| <i>CAMK1</i>      | 2,18 | 0,003   |
| <i>FAM63A</i>     | 2,18 | 0,002   |
| <i>THEX1</i>      | 2,19 | 0,001   |
| <i>LCAT</i>       | 2,19 | 0,001   |
| <i>NDFIP1</i>     | 2,19 | 0,002   |
| <i>SFXN4</i>      | 2,20 | 0,001   |
| <i>MARCH5</i>     | 2,20 | 0,001   |
| <i>MBNL3</i>      | 2,20 | 0,002   |
| <i>FXVD1</i>      | 2,21 | 0,002   |
| <i>MMP16</i>      | 2,21 | p<0,001 |
| <i>MXRA7</i>      | 2,21 | p<0,001 |



|                  |      |         |
|------------------|------|---------|
| <i>SCOC</i>      | 2,22 | 0,003   |
| <i>NKAPL</i>     | 2,22 | 0,001   |
| <i>HOXC6</i>     | 2,22 | 0,001   |
| <i>EDNRA</i>     | 2,22 | 0,003   |
| <i>ESF1</i>      | 2,22 | 0,001   |
| <i>MAGOHB</i>    | 2,22 | 0,001   |
| <i>RPS26L</i>    | 2,23 | 0,001   |
| <i>LONP2</i>     | 2,23 | 0,002   |
| <i>HOXA10</i>    | 2,23 | 0,002   |
| <i>PTH1R</i>     | 2,23 | 0,001   |
| <i>ZCCHC10</i>   | 2,24 | 0,002   |
| <i>HSP90B3P</i>  | 2,24 | 0,002   |
| <i>FAM108B1</i>  | 2,24 | 0,001   |
| <i>EFCAB2</i>    | 2,25 | 0,001   |
| <i>PLN</i>       | 2,25 | 0,001   |
| <i>LYSMD3</i>    | 2,26 | 0,001   |
| <i>COX19</i>     | 2,27 | 0,001   |
| <i>MYADM</i>     | 2,27 | p<0,001 |
| <i>CCDC104</i>   | 2,27 | 0,001   |
| <i>C18orf32</i>  | 2,27 | 0,002   |
| <i>ALDH4A1</i>   | 2,28 | 0,003   |
| <i>C1GALT1C1</i> | 2,28 | 0,000   |
| <i>BMP8B</i>     | 2,28 | 0,002   |
| <i>PTX3</i>      | 2,29 | p<0,001 |
| <i>RFX4</i>      | 2,29 | 0,001   |
| <i>KIAA1683</i>  | 2,29 | p<0,001 |
| <i>ZNF777</i>    | 2,29 | p<0,001 |
| <i>CDC37L1</i>   | 2,29 | 0,003   |
| <i>COX18</i>     | 2,30 | 0,002   |
| <i>HPS1</i>      | 2,30 | 0,003   |
| <i>BCL6B</i>     | 2,30 | 0,001   |
| <i>NOC3L</i>     | 2,30 | 0,002   |
| <i>PREPL</i>     | 2,30 | 0,001   |
| <i>NLRP12</i>    | 2,31 | p<0,001 |
| <i>MOCS1</i>     | 2,31 | p<0,001 |
| <i>GPBP1L1</i>   | 2,31 | 0,002   |
| <i>CHRDL1</i>    | 2,31 | 0,002   |
| <i>SLC36A4</i>   | 2,31 | 0,002   |
| <i>KLHL8</i>     | 2,32 | p<0,001 |
| <i>PDLIM3</i>    | 2,32 | 0,003   |
| <i>TMEM44</i>    | 2,32 | 0,003   |
| <i>C21orf130</i> | 2,33 | 0,003   |
| <i>ACTR1A</i>    | 2,33 | 0,001   |
| <i>BGN</i>       | 2,33 | p<0,001 |
| <i>GPR116</i>    | 2,34 | 0,002   |
| <i>RBM41</i>     | 2,34 | 0,002   |

|                 |      |         |
|-----------------|------|---------|
| <i>MOBKL1A</i>  | 2,34 | 0,001   |
| <i>PTPLB</i>    | 2,34 | 0,001   |
| <i>TMEM44</i>   | 2,34 | 0,002   |
| <i>C15orf58</i> | 2,35 | 0,001   |
| <i>DDX52</i>    | 2,35 | p<0,001 |
| <i>ANKS6</i>    | 2,35 | 0,002   |
| <i>FBLN1</i>    | 2,35 | 0,002   |
| <i>ISYNA1</i>   | 2,36 | p<0,001 |
| <i>DENND4C</i>  | 2,36 | 0,001   |
| <i>NCLN</i>     | 2,36 | 0,002   |
| <i>NR1H3</i>    | 2,36 | 0,002   |
| <i>TMEM183A</i> | 2,36 | p<0,001 |
| <i>PPIE</i>     | 2,37 | 0,001   |
| <i>ST7</i>      | 2,37 | 0,001   |
| <i>ZNF358</i>   | 2,38 | p<0,001 |
| <i>KLHDC10</i>  | 2,38 | p<0,001 |
| <i>PSIP1</i>    | 2,38 | 0,001   |
| <i>WASF1</i>    | 2,39 | 0,002   |
| <i>ATG3</i>     | 2,39 | p<0,001 |
| <i>RAB27B</i>   | 2,39 | 0,002   |
| <i>TEAD3</i>    | 2,40 | 0,001   |
| <i>CHD9</i>     | 2,40 | 0,001   |
| <i>PSMC3IP</i>  | 2,40 | 0,001   |
| <i>RSRC2</i>    | 2,40 | 0,002   |
| <i>RPS7</i>     | 2,41 | p<0,001 |
| <i>PXDN</i>     | 2,41 | 0,001   |
| <i>PPP1R12B</i> | 2,41 | 0,001   |
| <i>UGP2</i>     | 2,41 | 0,002   |
| <i>FBXO38</i>   | 2,42 | 0,002   |
| <i>IDS</i>      | 2,42 | 0,001   |
| <i>SCARA3</i>   | 2,42 | 0,001   |
| <i>NUCKS1</i>   | 2,42 | 0,001   |
| <i>CNBP</i>     | 2,42 | 0,001   |
| <i>NR4A3</i>    | 2,44 | 0,003   |
| <i>SFXN3</i>    | 2,44 | 0,002   |
| <i>GPX8</i>     | 2,44 | 0,002   |
| <i>ADRB3</i>    | 2,44 | 0,001   |
| <i>FGFR1</i>    | 2,44 | 0,002   |
| <i>SLC30A5</i>  | 2,44 | p<0,001 |
| <i>PCDHGA9</i>  | 2,45 | 0,001   |
| <i>CXCL6</i>    | 2,45 | p<0,001 |
| <i>NR4A3</i>    | 2,45 | 0,002   |
| <i>RFWD2</i>    | 2,45 | p<0,001 |
| <i>FAM26E</i>   | 2,45 | p<0,001 |
| <i>TRAPPC6B</i> | 2,46 | 0,002   |
| <i>TLN1</i>     | 2,46 | 0,003   |

|                  |      |         |
|------------------|------|---------|
| <i>TLK1</i>      | 2,46 | 0,003   |
| <i>NAMPT</i>     | 2,46 | 0,001   |
| <i>ARL5A</i>     | 2,47 | 0,001   |
| <i>RDH14</i>     | 2,48 | 0,001   |
| <i>TMEM183B</i>  | 2,49 | p<0,001 |
| <i>GPR162</i>    | 2,49 | 0,003   |
| <i>KIAA0090</i>  | 2,50 | 0,002   |
| <i>NBLA00301</i> | 2,51 | 0,003   |
| <i>ZBTB1</i>     | 2,51 | 0,002   |
| <i>RBM9</i>      | 2,51 | p<0,001 |
| <i>AP1S2</i>     | 2,51 | 0,002   |
| <i>SLMO1</i>     | 2,51 | p<0,001 |
| <i>SERPINE1</i>  | 2,51 | 0,001   |
| <i>NFE2L2</i>    | 2,51 | 0,001   |
| <i>C7orf41</i>   | 2,52 | 0,002   |
| <i>DUSP6</i>     | 2,53 | 0,002   |
| <i>C21orf2</i>   | 2,53 | 0,001   |
| <i>KCTD1</i>     | 2,54 | 0,001   |
| <i>DDX20</i>     | 2,55 | p<0,001 |
| <i>MYLK</i>      | 2,55 | 0,002   |
| <i>INO80B</i>    | 2,55 | 0,001   |
| <i>METTL2B</i>   | 2,57 | p<0,001 |
| <i>TM9SF3</i>    | 2,57 | 0,001   |
| <i>BHMT2</i>     | 2,57 | 0,002   |
| <i>NELF</i>      | 2,57 | 0,002   |
| <i>C1orf123</i>  | 2,57 | p<0,001 |
| <i>SON</i>       | 2,57 | 0,001   |
| <i>PBLD</i>      | 2,57 | p<0,001 |
| <i>LPAR4</i>     | 2,58 | 0,001   |
| <i>LMO3</i>      | 2,58 | p<0,001 |
| <i>ITM2A</i>     | 2,58 | p<0,001 |
| <i>EIF4E</i>     | 2,58 | p<0,001 |
| <i>COL4A2</i>    | 2,58 | 0,001   |
| <i>DLC1</i>      | 2,59 | 0,002   |
| <i>SLC35B4</i>   | 2,59 | p<0,001 |
| <i>SLC30A7</i>   | 2,59 | 0,001   |
| <i>HCFC1R1</i>   | 2,59 | p<0,001 |
| <i>SKAP2</i>     | 2,60 | 0,001   |
| <i>GIYD2</i>     | 2,60 | 0,002   |
| <i>PRND</i>      | 2,60 | 0,001   |
| <i>C10orf119</i> | 2,60 | 0,002   |
| <i>TSC22D3</i>   | 2,61 | 0,001   |
| <i>GAB2</i>      | 2,61 | p<0,001 |
| <i>C4orf27</i>   | 2,61 | p<0,001 |
| <i>ARHGAP21</i>  | 2,62 | 0,003   |
| <i>ASB1</i>      | 2,62 | p<0,001 |

|                 |      |         |
|-----------------|------|---------|
| <i>ABTB1</i>    | 2,62 | p<0,001 |
| <i>DUSP3</i>    | 2,63 | p<0,001 |
| <i>CLIP3</i>    | 2,63 | 0,001   |
| <i>ACOT2</i>    | 2,64 | p<0,001 |
| <i>RERG</i>     | 2,64 | 0,001   |
| <i>SERAC1</i>   | 2,64 | p<0,001 |
| <i>AXUD1</i>    | 2,65 | 0,002   |
| <i>CCNG1</i>    | 2,65 | 0,001   |
| <i>FASTK</i>    | 2,65 | p<0,001 |
| <i>SPAG16</i>   | 2,66 | 0,001   |
| <i>FAS</i>      | 2,66 | p<0,001 |
| <i>VPS24</i>    | 2,66 | 0,003   |
| <i>ECM2</i>     | 2,66 | 0,000   |
| <i>C10orf10</i> | 2,66 | 0,001   |
| <i>C9orf82</i>  | 2,67 | p<0,001 |
| <i>RAP1B</i>    | 2,67 | 0,001   |
| <i>DCAF10</i>   | 2,67 | 0,001   |
| <i>PGAM4</i>    | 2,68 | 0,002   |
| <i>LAMB1</i>    | 2,68 | p<0,001 |
| <i>ZNF542</i>   | 2,69 | p<0,001 |
| <i>ASB3</i>     | 2,69 | p<0,001 |
| <i>MID1</i>     | 2,69 | 0,001   |
| <i>KTELC1</i>   | 2,69 | p<0,001 |
| <i>SUZ12</i>    | 2,70 | p<0,001 |
| <i>CDH2</i>     | 2,70 | 0,001   |
| <i>C4orf18</i>  | 2,71 | 0,001   |
| <i>ARL4A</i>    | 2,71 | p<0,001 |
| <i>PPAP2B</i>   | 2,71 | 0,001   |
| <i>THBS3</i>    | 2,73 | 0,001   |
| <i>ANXA11</i>   | 2,73 | 0,001   |
| <i>C21orf33</i> | 2,74 | 0,002   |
| <i>FLJ21986</i> | 2,74 | 0,002   |
| <i>INVS</i>     | 2,74 | p<0,001 |
| <i>C1D</i>      | 2,74 | 0,001   |
| <i>GPER</i>     | 2,74 | 0,003   |
| <i>EEF1E1</i>   | 2,75 | p<0,001 |
| <i>CXCL2</i>    | 2,76 | 0,001   |
| <i>AGL</i>      | 2,76 | 0,003   |
| <i>FAM103A1</i> | 2,76 | 0,001   |
| <i>SERINC3</i>  | 2,77 | 0,002   |
| <i>SLC12A2</i>  | 2,77 | 0,002   |
| <i>KCNT2</i>    | 2,78 | p<0,001 |
| <i>SR140</i>    | 2,78 | p<0,001 |
| <i>PPP2R3A</i>  | 2,79 | p<0,001 |
| <i>NNT</i>      | 2,79 | p<0,001 |
| <i>NME1</i>     | 2,79 | p<0,001 |

|                 |      |         |
|-----------------|------|---------|
| <i>ACACB</i>    | 2,81 | 0,001   |
| <i>BAG2</i>     | 2,82 | p<0,001 |
| <i>SMAD5</i>    | 2,82 | 0,001   |
| <i>FLJ22795</i> | 2,83 | p<0,001 |
| <i>PANX2</i>    | 2,83 | 0,001   |
| <i>PTGIS</i>    | 2,83 | 0,003   |
| <i>SLC35C2</i>  | 2,84 | p<0,001 |
| <i>NUPL1</i>    | 2,85 | 0,001   |
| <i>ELANE</i>    | 2,86 | 0,002   |
| <i>CSNK1G2</i>  | 2,87 | 0,001   |
| <i>SORBS1</i>   | 2,87 | 0,002   |
| <i>SFRS5</i>    | 2,87 | 0,001   |
| <i>TSPAN4</i>   | 2,88 | 0,002   |
| <i>FANCL</i>    | 2,88 | 0,001   |
| <i>NME2</i>     | 2,88 | 0,003   |
| <i>C9orf37</i>  | 2,90 | 0,002   |
| <i>BOLA2</i>    | 2,90 | 0,001   |
| <i>SMAD9</i>    | 2,92 | p<0,001 |
| <i>ARL6IP5</i>  | 2,92 | 0,002   |
| <i>C15orf5</i>  | 2,92 | p<0,001 |
| <i>ADAM22</i>   | 2,93 | p<0,001 |
| <i>LIMS1</i>    | 2,94 | 0,001   |
| <i>CFLAR</i>    | 2,96 | 0,001   |
| <i>DEGS1</i>    | 2,99 | 0,001   |
| <i>DNAJB14</i>  | 3,00 | p<0,001 |
| <i>LEPR</i>     | 3,01 | 0,001   |
| <i>CSPG4</i>    | 3,01 | 0,001   |
| <i>C1orf215</i> | 3,03 | 0,003   |
| <i>RPS6KA3</i>  | 3,03 | p<0,001 |
| <i>METTL1</i>   | 3,03 | 0,002   |
| <i>CBX3</i>     | 3,03 | p<0,001 |
| <i>SYNPO2</i>   | 3,06 | 0,001   |
| <i>ICK</i>      | 3,06 | p<0,001 |
| <i>GEM</i>      | 3,06 | 0,003   |
| <i>NLF2</i>     | 3,06 | 0,002   |
| <i>KCNMA1</i>   | 3,06 | p<0,001 |
| <i>FAM43A</i>   | 3,10 | 0,002   |
| <i>PDF</i>      | 3,11 | p<0,001 |
| <i>ZNF644</i>   | 3,11 | 0,001   |
| <i>BBS5</i>     | 3,12 | p<0,001 |
| <i>DSTN</i>     | 3,12 | p<0,001 |
| <i>STXBP6</i>   | 3,13 | p<0,001 |
| <i>PEAR1</i>    | 3,13 | p<0,001 |
| <i>SMTN</i>     | 3,14 | 0,001   |
| <i>LAMA4</i>    | 3,15 | p<0,001 |
| <i>RANGRF</i>   | 3,15 | p<0,001 |

|                  |      |         |
|------------------|------|---------|
| <i>DNAJC25</i>   |      |         |
| <i>GNG10</i>     | 3,16 | p<0,001 |
| <i>XLKD1</i>     | 3,16 | 0,002   |
| <i>RDH11</i>     | 3,17 | p<0,001 |
| <i>TAF9B</i>     | 3,17 | p<0,001 |
| <i>SPRY2</i>     | 3,20 | 0,001   |
| <i>TCEA2</i>     | 3,22 | 0,003   |
| <i>TAGLN</i>     | 3,23 | 0,001   |
| <i>NR4A2</i>     | 3,23 | 0,001   |
| <i>GCNT1</i>     | 3,25 | 0,002   |
| <i>ZYG11B</i>    | 3,25 | p<0,001 |
| <i>ZNF521</i>    | 3,25 | 0,001   |
| <i>FERMT2</i>    | 3,26 | 0,001   |
| <i>GHR</i>       | 3,29 | p<0,001 |
| <i>HIF1A</i>     | 3,30 | p<0,001 |
| <i>C21orf34</i>  | 3,32 | 0,002   |
| <i>SEPT11</i>    | 3,35 | 0,001   |
| <i>FABP4</i>     | 3,37 | 0,003   |
| <i>DACT3</i>     | 3,38 | p<0,001 |
| <i>RNF150</i>    | 3,39 | p<0,001 |
| <i>ALDH5A1</i>   | 3,39 | p<0,001 |
| <i>DIO3OS</i>    | 3,40 | 0,003   |
| <i>SYNE1</i>     | 3,40 | p<0,001 |
| <i>LOC200030</i> | 3,42 | p<0,001 |
| <i>CD55</i>      | 3,43 | p<0,001 |
| <i>GABBR1</i>    | 3,43 | p<0,001 |
| <i>CILP</i>      | 3,45 | 0,001   |
| <i>ADAMTSL4</i>  | 3,48 | 0,003   |
| <i>C6orf62</i>   | 3,49 | p<0,001 |
| <i>TAF1B</i>     | 3,50 | p<0,001 |
| <i>CILP</i>      | 3,54 | 0,001   |
| <i>FAM108A1</i>  | 3,54 | p<0,001 |
| <i>NNMT</i>      | 3,57 | p<0,001 |
| <i>GSTM1</i>     | 3,58 | p<0,001 |
| <i>LOC401720</i> | 3,59 | p<0,001 |
| <i>RRM2B</i>     | 3,61 | p<0,001 |
| <i>CSDC2</i>     | 3,61 | 0,002   |
| <i>RASD2</i>     | 3,62 | 0,002   |
| <i>LCOR</i>      | 3,63 | p<0,001 |
| <i>NDUFA5</i>    | 3,67 | p<0,001 |
| <i>IL6</i>       | 3,67 | 0,002   |
| <i>FAM133B</i>   | 3,68 | p<0,001 |
| <i>FHL2</i>      | 3,69 | p<0,001 |
| <i>PLCD4</i>     | 3,69 | 0,001   |
| <i>SKP1A</i>     | 3,73 | p<0,001 |
| <i>CA3</i>       | 3,76 | p<0,001 |

|                 |       |         |
|-----------------|-------|---------|
| <i>RBPMS2</i>   | 3,82  | p<0,001 |
| <i>GEM</i>      | 3,84  | p<0,001 |
| <i>HTR2A</i>    | 3,86  | p<0,001 |
| <i>PHF20L1</i>  | 3,89  | p<0,001 |
| <i>PTGS2</i>    | 3,89  | 0,001   |
| <i>CALD1</i>    | 3,90  | p<0,001 |
| <i>PCP4</i>     | 3,98  | p<0,001 |
| <i>ABCC9</i>    | 4,10  | p<0,001 |
| <i>SELT</i>     | 4,12  | p<0,001 |
| <i>RGS11</i>    | 4,21  | p<0,001 |
| <i>PDE1A</i>    | 4,22  | p<0,001 |
| <i>RAB33B</i>   | 4,23  | p<0,001 |
| <i>RGS2</i>     | 4,25  | 0,001   |
| <i>ITGA5</i>    | 4,26  | p<0,001 |
| <i>GTF2A1L</i>  | 4,27  | p<0,001 |
| <i>CYB5R1</i>   | 4,37  | p<0,001 |
| <i>INHBA</i>    | 4,37  | p<0,001 |
| <i>CYP19A1</i>  | 4,46  | p<0,001 |
| <i>ADAMTS4</i>  | 4,77  | p<0,001 |
| <i>FLNC</i>     | 4,83  | 0,001   |
| <i>RPESP</i>    | 5,05  | p<0,001 |
| <i>DSEL</i>     | 5,27  | p<0,001 |
| <i>AKR1C1</i>   | 5,30  | p<0,001 |
| <i>KGFLP1</i>   | 5,44  | p<0,001 |
| <i>INS IGF2</i> | 5,50  | p<0,001 |
| <i>GSTM1</i>    | 9,28  | p<0,001 |
| <i>GSTM2</i>    | 9,75  | p<0,001 |
| <i>FOSB</i>     | 10,18 | p<0,001 |

**Supplementary Table S3.** Clinical annotations for the cohort of discovery phase (corresponding to GEO GSE149582 dataset).

|                  | LAB CODE | SEX | AGE (years) | Type of surgery | pT | Grade | Node | NAC | CIS | PROGRESSION | TIME TO PROGRESSION (months) | OVERALL SURVIVAL | TIME TO DEAD (months) | CANCER SPECIFIC SURVIVAL |
|------------------|----------|-----|-------------|-----------------|----|-------|------|-----|-----|-------------|------------------------------|------------------|-----------------------|--------------------------|
| DE NOVO MIBC     | B778     | M   | 56          | TURB            | T2 | HG    | NO   | 1   | 1   | 1           | 35                           | 1                | 58                    | 1                        |
|                  | B1202    | M   | 48          | TURB            | T2 | HG    | NO   | 1   | 0   | 0           | 98                           | 0                | -                     | 0                        |
|                  | B1192    | M   | 58          | TURB            | T2 | HG    | NO   | 1   | 1   | NA          | NA                           | NA               | NA                    | NA                       |
|                  | B897     | M   | 73          | TURB            | T2 | HG    | NO   | 1   | 1   | 0           | 73                           | 1                | 73                    | 0                        |
|                  | B643     | M   | 63          | TURB            | T2 | HG    | NO   | 1   | 0   | 0           | 89                           | 0                | -                     | 0                        |
|                  | B1216    | M   | 70          | TURB            | T2 | HG    | NO   | 1   | 1   | 0           | 73                           | 0                | -                     | 0                        |
|                  | B1218    | M   | 68          | TURB            | T2 | HG    | NO   | 1   | 1   | 0           | 73                           | 0                | -                     | 0                        |
|                  | B1197    | M   | 53          | TURB            | T2 | HG    | NO   | 1   | 1   | 0           | 115                          | 0                | -                     | 0                        |
|                  | B1193    | M   | 70          | TURB            | T2 | HG    | N1   | 1   | 1   | 1           | 5                            | 1                | 8                     | 1                        |
|                  | B1196    | M   | 70          | TURB            | T2 | HG    | N2   | 1   | 0   | 1           | 5                            | 1                | 7                     | 1                        |
|                  | B1776    | M   | 84          | Cystectomy      | T2 | HG    | NO   | 0   | 0   | 0           | 91                           | 1                | 91                    | 0                        |
| B1830            | M        | 79  | Cystectomy  | T4              | HG | N1    | 0    | 0   | 1   | 5           | 1                            | 6                | 1                     |                          |
| PROGRESSIVE MIBC | B155     | F   | 82          | Cystectomy      | T2 | HG    | NO   | 0   | 0   | 1           | 11                           | 1                | 12                    | 1                        |
|                  | B336     | M   | 77          | Cystectomy      | T2 | HG    | NO   | 0   | 0   | 0           | 92                           | 0                | -                     | 0                        |
|                  | B1681b   | M   | 70          | Cystectomy      | T2 | HG    | NO   | 0   | 0   | 1           | 4                            | 1                | 4                     | 1                        |
|                  | B1682b   | M   | 87          | Cystectomy      | T2 | HG    | NO   | 0   | 0   | 0           | 0                            | 1                | 0                     | 0                        |
|                  | B1683b   | M   | 72          | Cystectomy      | T1 | HG    | NO   | 0   | 0   | 1           | 69                           | 1                | 76                    | 1                        |
|                  | B1684b   | M   | 68          | Cystectomy      | T2 | HG    | NO   | 0   | 0   | 0           | 1                            | 1                | 1                     | 0                        |
|                  | B1691    | M   | 79          | TURB            | T2 | HG    | NA   |     |     | 1           | 24                           | 1                | 24                    | 1                        |
|                  | B1846    | M   | 69          | Cystectomy      | T2 | HG    | NO   | 0   | 1   | 1           | 15                           | 1                | 37                    | 1                        |
|                  | B1848    | M   | 54          | Cystectomy      | T3 | HG    | NO   | 0   | 0   | 0           | 2                            | 1                | 2                     | 0                        |
|                  | B1850    | M   | 79          | Cystectomy      | T3 | HG    | NO   | 0   | 1   | 1           | 19                           | 1                | 21                    | 1                        |
|                  | B1852    | M   | 74          | Cystectomy      | T4 | HG    | NO   | 0   | 0   | 1           | 1                            | 1                | 11                    | 1                        |
|                  | B1866    | M   | 79          | Cystectomy      | T2 | HG    | NO   | 0   | 0   | 0           | 0                            | 1                | 0                     | 0                        |
|                  | B1868    | M   | 71          | Cystectomy      | T2 | HG    | NO   | 0   | 1   | 0           | 73                           | 1                | 73                    | 0                        |
|                  | B688     | M   | 78          | Cystectomy      | T3 | HG    | NO   | 0   | 0   | 0           | 9                            | 1                | 9                     | 0                        |

**LEGEND**

0/1 NO/YES  
 HG High grade  
 TURB Transurethral resection of the bladder  
 SEX M/F Male/Female  
 NAC Neoadjuvant chemotherapy  
 NA Non available



**Supplementary Table S3. Genes analyzed in Biomark 96.96 Dynamic Arrays (Fluidigm).**

| GENES FROM TCGA <sup>1</sup><br>(N= 52) |                 | GENES IDENTIFIED BY<br>MICROARRAY EXPERIMENT<br>(N= 33) | GENES INVOLVED IN IMMUNE<br>AND<br>PROGRESSION MECHANISMS <sup>2-10</sup><br>(N=9) | ENDOGENOUS<br>GENES<br>(N= 2) |
|-----------------------------------------|-----------------|---------------------------------------------------------|------------------------------------------------------------------------------------|-------------------------------|
| Luminal markers                         | <i>KRT20</i>    | <i>ABCC9</i>                                            | <i>PDCD1</i>                                                                       | <i>BGUS</i>                   |
|                                         | <i>PPARG</i>    | <i>ARL5A</i>                                            | <i>CTLA4</i>                                                                       | <i>PPIA</i>                   |
|                                         | <i>FOXA1</i>    | <i>CALD1</i>                                            | <i>CD80</i>                                                                        |                               |
|                                         | <i>GATA3</i>    | <i>CHMP4B</i>                                           | <i>AR</i>                                                                          |                               |
|                                         | <i>SNX31</i>    | <i>CYB5R1</i>                                           | <i>FOXM1</i>                                                                       |                               |
|                                         | <i>UPK1A</i>    | <i>DSEL</i>                                             | <i>ERBB2</i>                                                                       |                               |
|                                         | <i>UPK2</i>     | <i>DUSP3</i>                                            | <i>EGFR</i>                                                                        |                               |
|                                         | <i>FGFR3</i>    | <i>DUSP6</i>                                            | <i>IGF2</i>                                                                        |                               |
| ECM and smooth<br>muscle                | <i>PGM5</i>     | <i>FANCL</i>                                            | <i>STAT3</i>                                                                       |                               |
|                                         | <i>DES</i>      | <i>FLNC</i>                                             |                                                                                    |                               |
|                                         | <i>C7</i>       | <i>FOSB</i>                                             |                                                                                    |                               |
|                                         | <i>SFRP4</i>    | <i>GEM</i>                                              |                                                                                    |                               |
|                                         | <i>COMP</i>     | <i>GSTM2</i>                                            |                                                                                    |                               |
|                                         | <i>SGCD</i>     | <i>HIF1A</i>                                            |                                                                                    |                               |
| EMT and Claudin<br>markers              | <i>ZEB1</i>     | <i>HTR2A</i>                                            |                                                                                    |                               |
|                                         | <i>ZEB2</i>     | <i>IFI27</i>                                            |                                                                                    |                               |
|                                         | <i>SNAI1</i>    | <i>INS-IGF2</i>                                         |                                                                                    |                               |
|                                         | <i>TWIST1</i>   | <i>LAMB1</i>                                            |                                                                                    |                               |
|                                         | <i>CDH2</i>     | <i>METTL1</i>                                           |                                                                                    |                               |
|                                         | <i>CLDN7</i>    | <i>PLCD4</i>                                            |                                                                                    |                               |
|                                         | <i>CLDN4</i>    | <i>PTGS2</i>                                            |                                                                                    |                               |
| Basal markers                           | <i>CD44</i>     | <i>RAB33B</i>                                           |                                                                                    |                               |
|                                         | <i>KRT6A</i>    | <i>RGS2</i>                                             |                                                                                    |                               |
|                                         | <i>KRT5</i>     | <i>FGFR1</i>                                            |                                                                                    |                               |
|                                         | <i>KRT14</i>    | <i>RSRC2</i>                                            |                                                                                    |                               |
|                                         | <i>COL17A1</i>  | <i>SELT</i>                                             |                                                                                    |                               |
| Squamous markers                        | <i>DSC3</i>     | <i>SEPT11</i>                                           |                                                                                    |                               |
|                                         | <i>GSDMC</i>    | <i>RBPMS2</i>                                           |                                                                                    |                               |
|                                         | <i>TGM1</i>     | <i>LCOR</i>                                             |                                                                                    |                               |
|                                         | <i>PI3</i>      | <i>SMAD5</i>                                            |                                                                                    |                               |
|                                         | <i>TP63</i>     | <i>SPRY2</i>                                            |                                                                                    |                               |
| Neuronal-<br>differentiation            | <i>MSI1</i>     | <i>USP42</i>                                            |                                                                                    |                               |
|                                         | <i>PLEKHG4B</i> | <i>ITGA5</i>                                            |                                                                                    |                               |
|                                         | <i>GNG4</i>     |                                                         |                                                                                    |                               |
|                                         | <i>PEG10</i>    |                                                         |                                                                                    |                               |
|                                         | <i>RND2</i>     |                                                         |                                                                                    |                               |
|                                         | <i>APLP1</i>    |                                                         |                                                                                    |                               |
|                                         | <i>SOX2</i>     |                                                         |                                                                                    |                               |
|                                         | <i>TUBB2B</i>   |                                                         |                                                                                    |                               |
| Immune markers                          | <i>CD274</i>    |                                                         |                                                                                    |                               |
|                                         | <i>PDCD1LG2</i> |                                                         |                                                                                    |                               |
|                                         | <i>IDO1</i>     |                                                         |                                                                                    |                               |
|                                         | <i>CXCL11</i>   |                                                         |                                                                                    |                               |
|                                         | <i>L1CAM</i>    |                                                         |                                                                                    |                               |
|                                         | <i>SAA1</i>     |                                                         |                                                                                    |                               |
| Down-regulated in CIS                   | <i>CRTAC1</i>   |                                                         |                                                                                    |                               |
|                                         | <i>CTSE</i>     |                                                         |                                                                                    |                               |
|                                         | <i>PADI3</i>    |                                                         |                                                                                    |                               |
| Up-regulated in CIS                     | <i>MSN</i>      |                                                         |                                                                                    |                               |

|                |              |
|----------------|--------------|
|                | <i>NR3C1</i> |
| Sonic Hedgehog | <i>SHH</i>   |
|                | <i>BMP5</i>  |

Thirty-three of 94 genes were selected because of their differential expression (FDR<0.05) in microarray experiments, 52 genes were selected from The Cancer Genome Atlas (TCGA)<sup>1</sup> and 9 genes were selected from the literature<sup>2-10</sup> because of their involvement in immune and progression mechanisms in MIBC.

1. Robertson, A. G. *et al.* Comprehensive Molecular Characterization of Muscle-Invasive Bladder Cancer. *Cell*. **174**, 1033 (2018).
2. Zichi, C. *et al.* Immunotherapy for Patients with Advanced Urothelial Cancer: Current Evidence and Future Perspectives. *Biomed Res. Int.* **2017**, 5618174 (2017).
3. Ali, A. *et al.* Prognostic significance of epidermal growth factor receptor ( EGFR ) over expression in urothelial carcinoma of urinary bladder. *BMC Urol.* **18**, 59 (2018).
4. Jitao, W. *et al.* Androgen receptor inducing bladder cancer progression by promoting an epithelial – mesenchymal transition. *Andrología.* **46**, 1128-1133 (2014).
5. The Cancer Genome Atlas *et al.* Comprehensive molecular characterization of urothelial bladder carcinoma. *Nature.* **507**, 315-322 (2014).
6. Koga, F., Takemura, K. & Fukushima, H. Biomarkers for Predicting Clinical Outcomes of Chemoradiation-Based Bladder Preservation Therapy for Muscle-Invasive Bladder Cancer. *Int. J. Mol. Sci.* **19**, 2777 (2018).
7. Rinaldetti, S. *et al.* FOXM1 predicts disease progression in non-muscle invasive bladder cancer. *J. Cancer Res. Clin. Oncol.* **144**, 1701–1709 (2018).
8. Tomlinson, D. C., Baxter, E. W., Loadman, P. M., Hull, M. A. & Knowles, M. A.

FGFR1-Induced Epithelial to Mesenchymal Transition through MAPK / PLC c / COX-2-Mediated Mechanisms. *PLoS One*. **7**, e38972 (2012).

9. Kamoun, A. *et al.* The consensus molecular classification of muscle-invasive bladder cancer. *Eur. Urol.* **77**, 420-433 (2020).
10. Roudnicky, F. *et al.* High expression of insulin receptor on tumour-associated blood vessels in invasive bladder cancer predicts poor overall and progression-free survival. *J. Pathol.* **242**, 193–205 (2017).
